# Supplementary material for: Irritable bowel syndrome and Parkinson’s disease risk: register-based studies
Source: PubMed Central journal article supplement (PMC7785733; doi:10.1038/s41531-020-00145-8), 2021-01-05
Supplement: 41531_2020_145_MOESM1_ESM.pdf [file 41531_2020_145_MOESM1_ESM.pdf]

## Supplementary material

**Supplementary Table 1** ICD codes for identification of inflammatory bowel disease, colorectal cancer and celiac disease.

| <b>Diagnosis</b>                  | <b>ICD-7<br/>up to 1968</b> | <b>ICD-8<br/>1969-1986</b> | <b>ICD-9<br/>1987-1996</b> | <b>ICD-10<br/>1997 onward</b> |
|-----------------------------------|-----------------------------|----------------------------|----------------------------|-------------------------------|
| <b>Inflammatory bowel disease</b> |                             |                            |                            |                               |
| Ulcerative colitis (UC)           | 572.20, 572.21              | 563.10, 563.99,<br>569.02  | 556                        | K51                           |
| Crohn's disease (CD)              | 572.00, 572.09              | 563.00                     | 555                        | K50                           |
| Unclassified (IBD-U)              | UC+CD                       | UC+CD                      | UC+CD                      | UC + CD, or K52.3             |
| <b>Colorectal cancer</b>          | 153,154                     | 153,154                    | 153,154                    | C18,C19,C20,C21               |
| <b>Celiac disease</b>             | 286.00                      | 269.00                     | 579A                       | K900                          |

**Supplementary Table 2** ICD codes for identifying comorbidity

|                                                       | <b>ICD-7<br/>up to 1968</b>         | <b>ICD-8<br/>1969-1986</b>                            | <b>ICD-9<br/>1987-1996</b>                          | <b>ICD-10<br/>1997 onward</b>                                                                                        |
|-------------------------------------------------------|-------------------------------------|-------------------------------------------------------|-----------------------------------------------------|----------------------------------------------------------------------------------------------------------------------|
| <b>- Myocardial infarction</b>                        | 420.1                               | 410, 411                                              | 410.x, 412.x                                        | I21.x, I22.x, I25.2                                                                                                  |
| <b>- Congestive heart failure</b>                     | 434.1, 434.2                        | 427.0,<br>427.1,428,782.4                             | 428                                                 | I09.9, I11.0, I13.0, I13.2,<br>I25.5, I42.0, I42.5-I42.9,<br>I43.x, I50.x, P29.0                                     |
| <b>- Peripheral vascular disease<sup>a</sup></b>      | 450.x, 451,<br>453.3, 455           | 441, 443.9, 445                                       | 441,443.9,785.4,<br>V43.4                           | I70.x, I71.x, I73.1, I73.8,<br>I73.9, I77.1, I79.0, I79.2,<br>K55.1, K55.8, K55.9,<br>Z95.8, Z95.9                   |
| <b>- Cerebrovascular disease</b>                      | 330-334                             | 430-438                                               | 430.x-438.x                                         | G45.x, G46.x, H34.0,<br>I60.x-I69.x                                                                                  |
| <b>- Chronic obstructive pulmonary disease (COPD)</b> | 502                                 | 491, 492                                              | 491,492,496                                         | J41-J44                                                                                                              |
| <b>- Other chronic pulmonary disease<sup>b</sup></b>  | 523-524                             | 515-517                                               | 500-505, 506.4                                      | J60.x-J67.x, J68.4, J70.x,<br>J70.3                                                                                  |
| <b>- Rheumatologic disease</b>                        | 710.0, 726.3,<br>727<br>722.x, 525, | 734.0, 734.1,<br>716.1, 712.1-<br>712.5, 515.9, 717.9 | 710.0, 710.1, 710.4,<br>714.0-714.2, 714.81,<br>725 | M05.x, M06.x, M31.5,<br>M32.x-M34.x, M35.1,<br>M35.3, M36.0                                                          |
| <b>- Osteoarthritis</b>                               | 723                                 | 713                                                   | 715                                                 | M15-M19                                                                                                              |
| <b>- Dementia</b>                                     | 304, 305, 308                       | 290, 309, 293.4                                       | 290                                                 | F00.x-F03.x, F05.1,<br>G30.x, G31.1                                                                                  |
| <b>- Hemiplegia</b>                                   | 357, 351, 352                       | 344.1. 344.2                                          | 344.1, 342                                          | G04.1, G11.4, G80.1,<br>G80.2, G81.x, G82.x,<br>G83.0-G83.4, G83.9                                                   |
| <b>- Diabetes</b>                                     | 260.09 (only in<br>Swedish ICD)     | 250                                                   | 250.0, 250.1, 250.2,<br>250.3,250.7                 | E10.0, E10.1, E10.6,<br>E10.8, E10.9, E11.0,<br>E11.1, E11.6, E11.8,<br>E11.9, E12.0, E12.1,<br>E12.6, E12.8, E12.9, |

|                                                   |                                     |                                                    |                                          |                                                                                                         |
|---------------------------------------------------|-------------------------------------|----------------------------------------------------|------------------------------------------|---------------------------------------------------------------------------------------------------------|
|                                                   |                                     |                                                    |                                          | E13.0, E13.1, E13.6, E13.8, E13.9, E14.0, E14.1, E14.6, E14.8, E14.9                                    |
| - Diabetes with end organ damage                  | 260.20-260.99 (only in Swedish ICD) | 250.01-250.05; 250.07-250.09 (only in Swedish ICD) | 250.4-250.6                              | E10.2-E10.5, E10.7, E11.2-E11.5, E11.7, E12.2-E12.5, E12.7, E13.2-E13.5, E13.7, E14.2-E14.5, E14.7      |
| - Moderate or severe renal disease                | 592, 593, 603, 792                  | 582, 583, 584, 593.2, 792, 593.0                   | 582.x, 583-583.7, 585, 586, 588-588.9    | I12.0, I13.1, N03.2-N03.7, N05.2-N05.7, N18.x, N19.x, N25.0, Z49.0-Z49.2, Z94.0, Z99.2                  |
| - Mild liver disease                              | 581, 583                            | 571.x, 573                                         | 571.2, 571.4, 571.5, 571.6               | B18.x, K70.0-K70.3, K70.9, K71.3-K71.5, K71.7, K73.x, K74.x, K76.0, K76.2-K76.4, K76.8, K76.9, Z94.4    |
| - Moderate or severe liver disease                | 581, 583, 462, 1                    | 571.x, 573, 456.0                                  | 572.2, 572.3, 572.4, 572.8, 456.0-456.21 | I85.0, I85.9, I86.4, I98.2, K70.4, K71.1, K72.1, K72.9, K76.5, K76.6, K76.7                             |
| - Ulcer disease                                   | 540, 541, 542                       | 531-534                                            | 531-534                                  | K25.x-K28.x                                                                                             |
| - Any malignancy, including leukemia and lymphoma | 140-155, 157-164, 170-204           | 140-195, 200-209                                   | 140-172.9, 174-195.8, 200-208.9          | C00.x-C26.x, C30.x-C34.x, C37.x-C41.x, C43.x, C45.x-C58.x, C60.x-C76.x, C81.x-C85.x, C88.x, C90.x-C97.x |
| - Metastatic cancer                               | 156, 163, 165                       | 196-199                                            | 196, 197, 198, 199.0, 199.1              | C77.x- C80.x                                                                                            |
| - HIV/AIDS                                        | not applicable                      | not applicable                                     | 042, 043, 044                            | B20.x-B22.x, B24.x                                                                                      |

a. Also included surgery codes: 8884, 8885, 8815, 8816, 8817, 8818, 8886, 8887, 8825, 8826, 8827, 8828 from the Swedish Classification of Operations and Major Procedures. b. Other chronic pulmonary diseases including pneumoconiosis, and chronic respiratory conditions due fumes and vapors.

**Supplementary Table 3** Irritable bowel syndrome diagnosis and risk of Parkinson's disease in nationwide nested case-control study: sensitivity analyses adjusting for simulated smoking status and constipation

|                | OR (95% CI) <sup>a</sup> | OR (95% CI) <sup>b</sup> | Approximate RR / E-value <sup>c</sup> (95% CI lower band) <sup>d</sup> |
|----------------|--------------------------|--------------------------|------------------------------------------------------------------------|
| <b>Non IBS</b> | 1                        | 1                        | 1                                                                      |
| <b>IBS</b>     | 1.47 (1.30-1.66)         | 1.24 (1.10-1.40)         | 1.29 / 1.89 (1.64)                                                     |

a: model conditional on sex and birth year matching pairs, country of birth, highest achieved education, COPD, comorbidity index, *simulated smoking status*; b. model conditional on sex and birth year matching pairs, country of birth, highest achieved education, COPD, comorbidity index, *simulated constipation status*, c. E-value gauges the robustness of the results to unmeasured confounding. A large E-value indicates more robust results. An E-value of 1.89 indicates that an unmeasured confounder associated with both IBS and PD by the relative risk of 1.89 each would explain away an approximate RR of 1.29 (equivalent to an OR of 1.44, CI: 1.27-1.63). d: The 95% CI lower band of the E-value (i.e. 1.64) was calculated for the 95% CI lower band of 1.27 for the IBS and PD association.

**Supplementary Table 4** Irritable bowel syndrome diagnosis and risk of Parkinson’s disease in nationwide nested case-control study: sensitivity analyses restricting to primary PD register diagnosis and adjusting for number of hospital visits

|                                                   | Restricted to primary PD diagnosis |                          | Adjusting for number of hospital visits |                          |
|---------------------------------------------------|------------------------------------|--------------------------|-----------------------------------------|--------------------------|
|                                                   | PD/control <sup>a</sup>            | OR (95% CI) <sup>a</sup> | PD/control <sup>b</sup>                 | OR (95% CI) <sup>b</sup> |
| <b>Non IBS</b>                                    | 29,106/873,904                     | 1                        | 56311/1,691,716                         | 1                        |
| <b>IBS</b>                                        | 128/3,116                          | 1.27 (1.07-1.52)         | 253/5,204                               | 1.23 (1.08-1.40)         |
| Years before index date                           |                                    |                          |                                         |                          |
| <5                                                | 48/1,339                           | 1.09 (0.82-1.46)         | 93/2,105                                | 1.12 (0.91-1.38)         |
| ≥5                                                | 80/1,777                           | 1.41 (1.13-1.77)         | 160/3,099                               | 1.31 (1.11-1.53)         |
| <10                                               | 88/2,070                           | 1.30 (1.05-1.61)         | 166/3,331                               | 1.27 (1.08-1.48)         |
| ≥10                                               | 40/1,046                           | 1.21 (0.88-1.66)         | 87/1,873                                | 1.17 (0.94-1.45)         |
| Age at IBS diagnosis, years                       |                                    |                          |                                         |                          |
| <50                                               | 20/572                             | 1.09 (0.70-1.71)         | 28/766                                  | 0.93 (0.63-1.35)         |
| ≥50                                               | 108/2,544                          | 1.31 (1.08-1.59)         | 225/4,438                               | 1.28 (1.12-1.47)         |
| <b>Stratified by Sex</b>                          |                                    |                          |                                         |                          |
| Male                                              | 44/1,102                           | 1.23 (0.91-1.67)         | 89/1,789                                | 1.27 (1.02-1.57)         |
| Female                                            | 84/2,014                           | 1.29 (1.04-1.61)         | 164/3,415                               | 1.21 (1.04-1.42)         |
| <b>Stratified by age on the index date, years</b> |                                    |                          |                                         |                          |
| <70                                               | 58/1,242                           | 1.45 (1.11-1.88)         | 80/1,538                                | 1.29 (1.03-1.62)         |
| 70-79                                             | 51/1,321                           | 1.19 (0.90-1.58)         | 101/2,184                               | 1.17 (0.95-1.42)         |
| ≥80                                               | 19/553                             | 1.08 (0.68-1.71)         | 72/1,482                                | 1.27 (1.00-1.61)         |

a. restricted to *primary PD cases* and controls, n=906,254, conditional on sex and birth year matching pairs, country of birth, highest achieved education, chronic obstructive pulmonary disease (COPD), comorbidity index. No statistically significant interaction was found between IBS and age at IBS diagnosis (*p for interaction* = 0.46). b. entire nested case-control study n=1,753,484, conditional on sex and birth year matching pairs, country of birth, highest achieved education, COPD, comorbidity index, *number of hospital visits*. No statistically significant interaction was found between IBS and age at IBS diagnosis (*p for interaction* = 0.11).
